# Supplementary figures and images for: Chemical analysis of freeze-dried seeds of Stenocereus stellatus (white tunillo) components and evaluation of their effect on prediabetes reversion in an experimental model in female Wistar rats
Source: Royal Society of Chemistry journal article supplement (doi:10.1039/d4fo01908c), 2024-01-01

### Figure 10 A SOD 2

In paper,  
n = 4

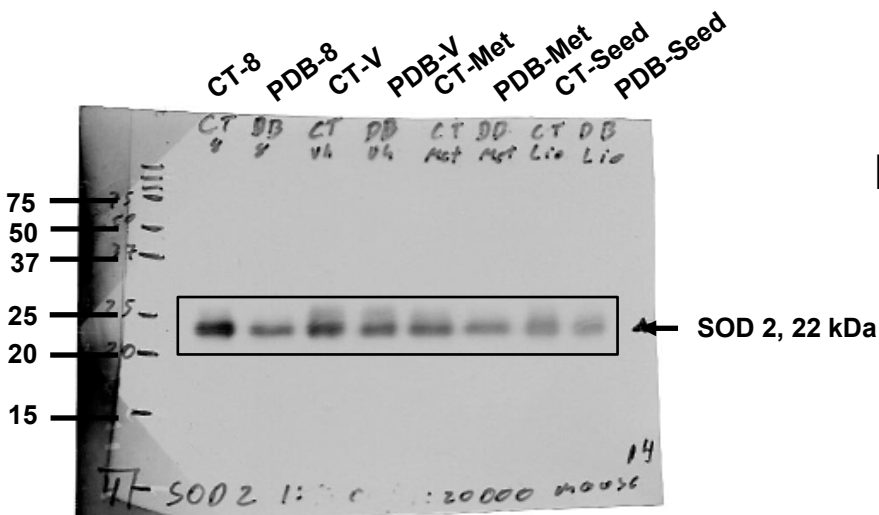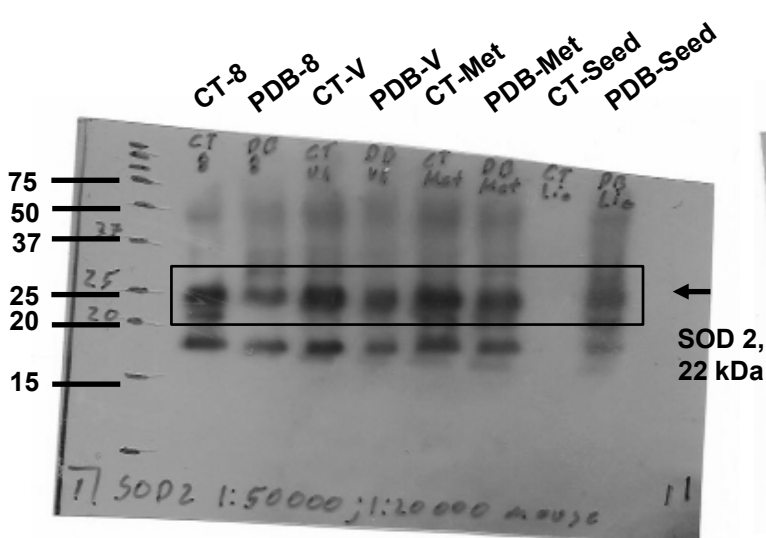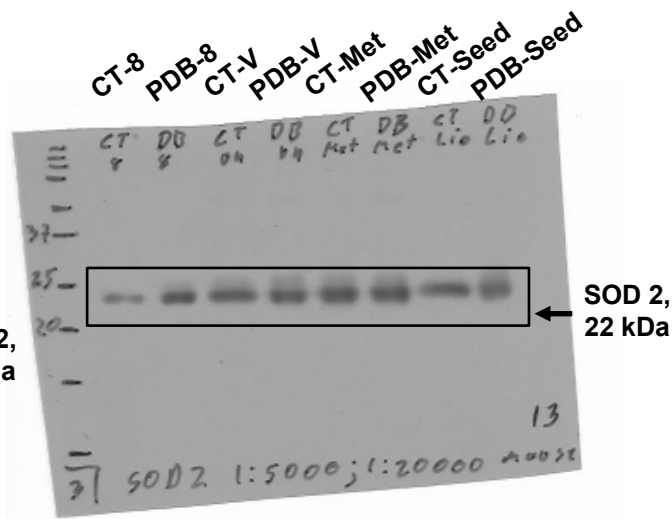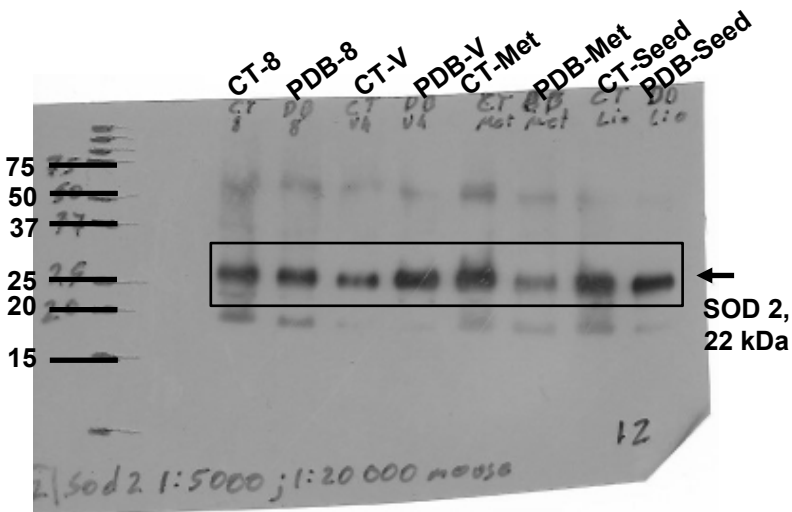

Supplement: d4fo01908c1.pdf [file d4fo01908c1.pdf]

# Figure S10 B

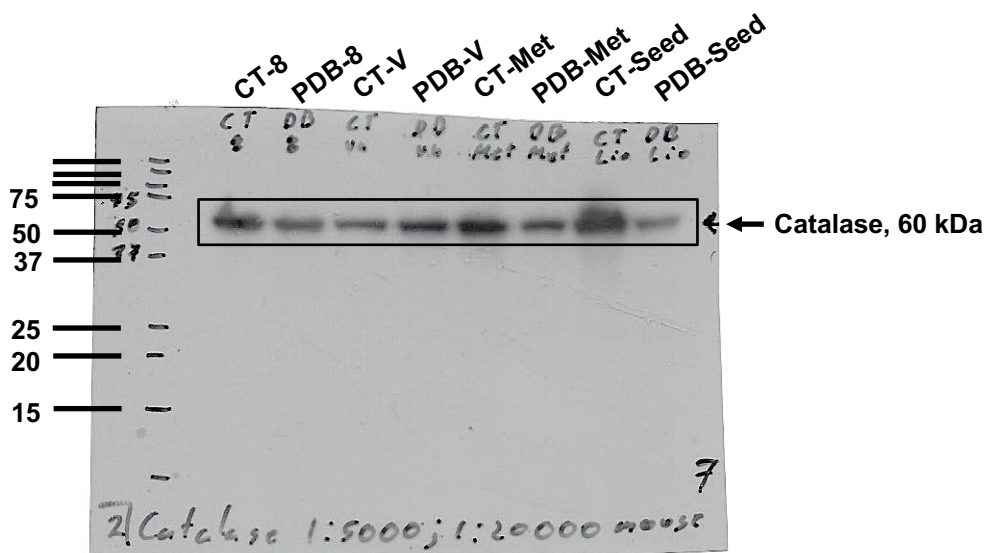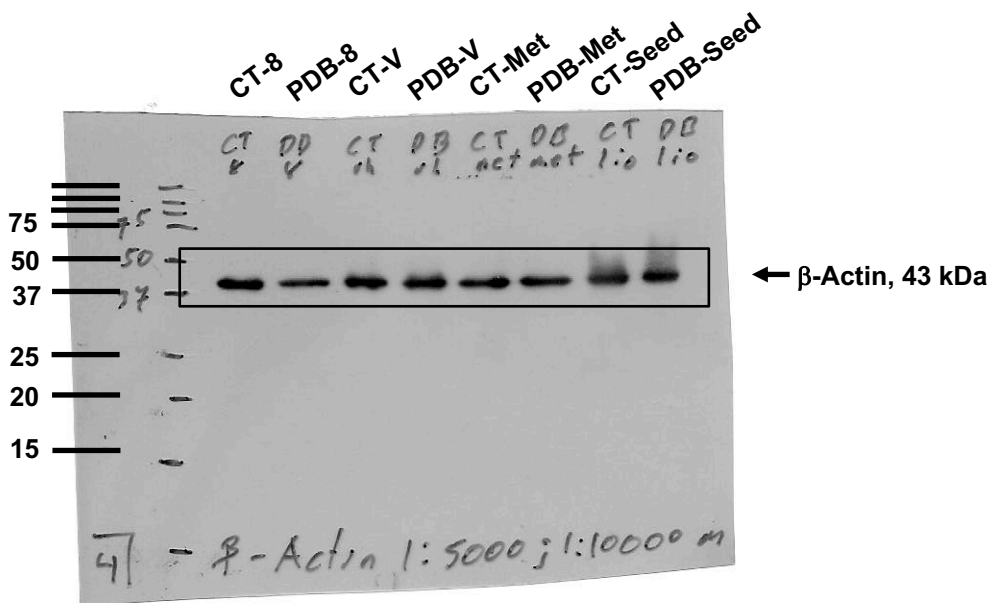

Figure 10B in paper

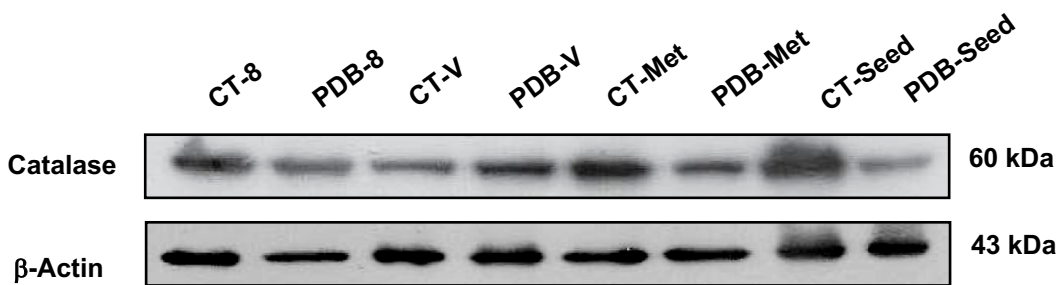

Supplement: d4fo01908c10.pdf [file d4fo01908c10.pdf]

# Figure S10 C

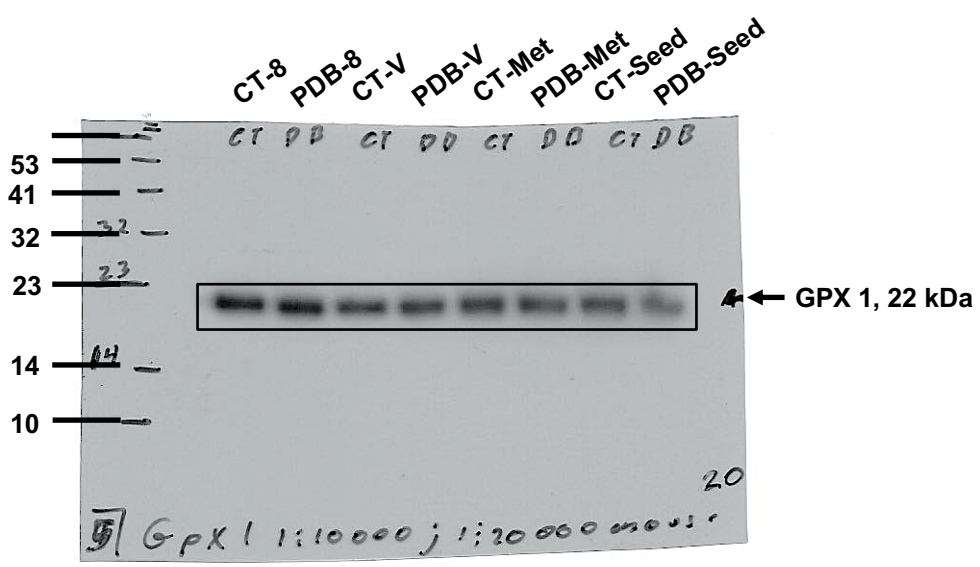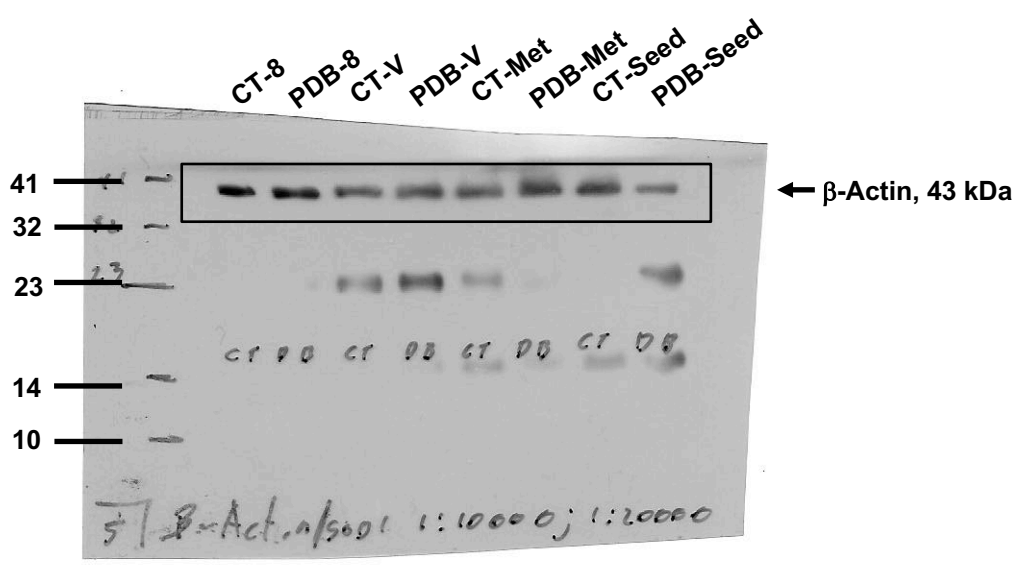

Figure 10C in paper

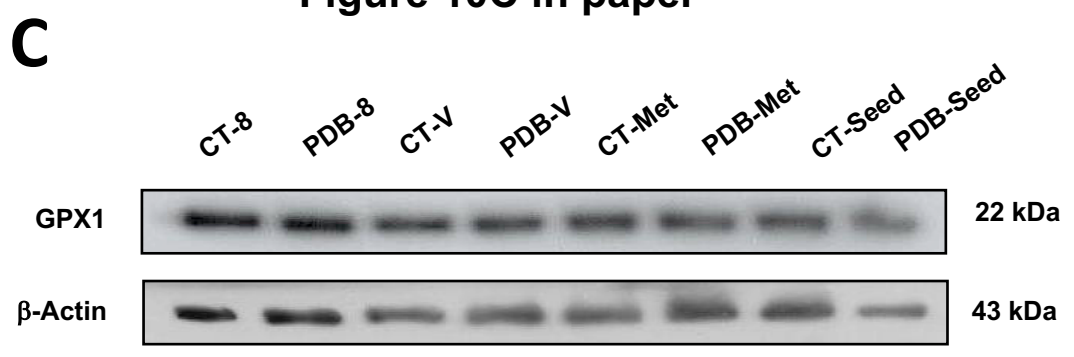

Supplement: d4fo01908c11.pdf [file d4fo01908c11.pdf]

# Figure S10 D

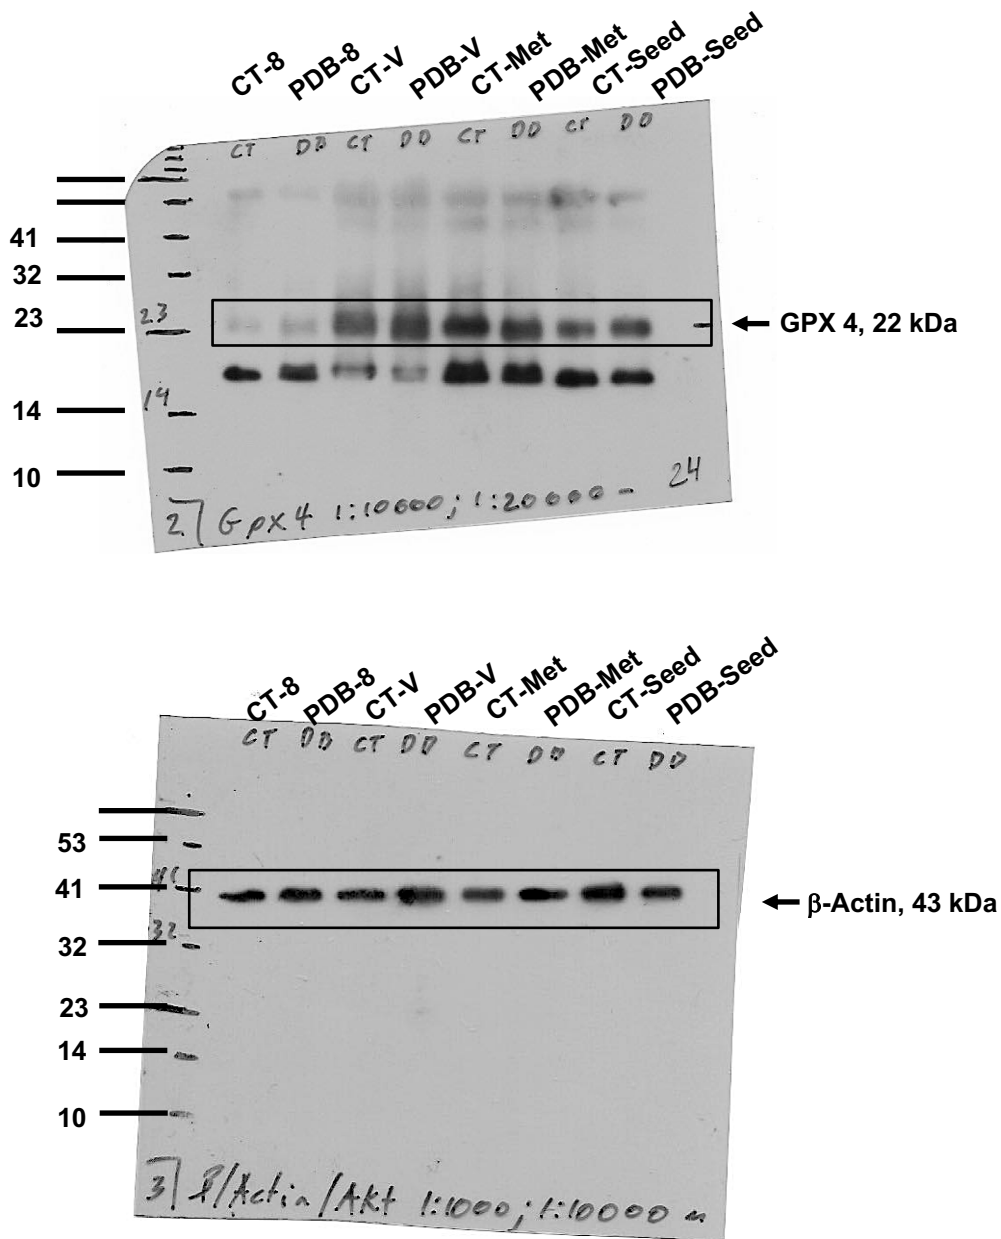

Figure 10D in paper

D

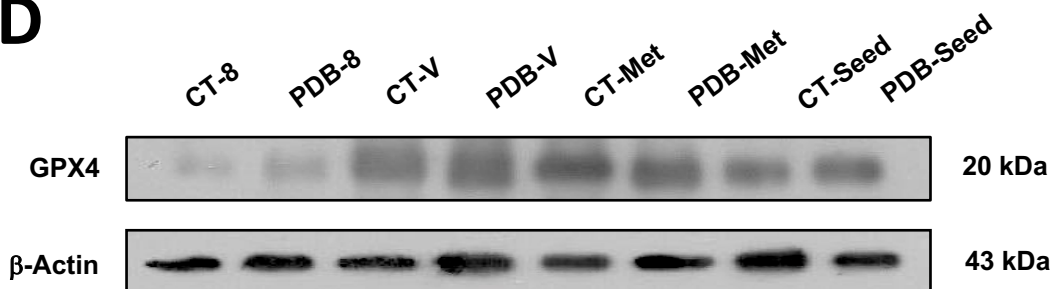

Supplement: d4fo01908c12.pdf [file d4fo01908c12.pdf]

# Figure S10 D

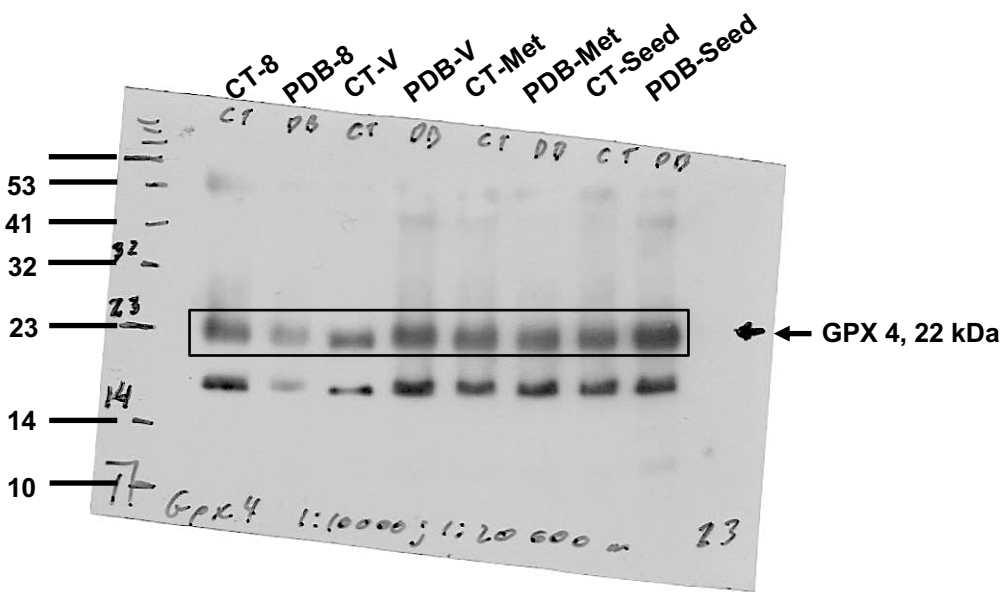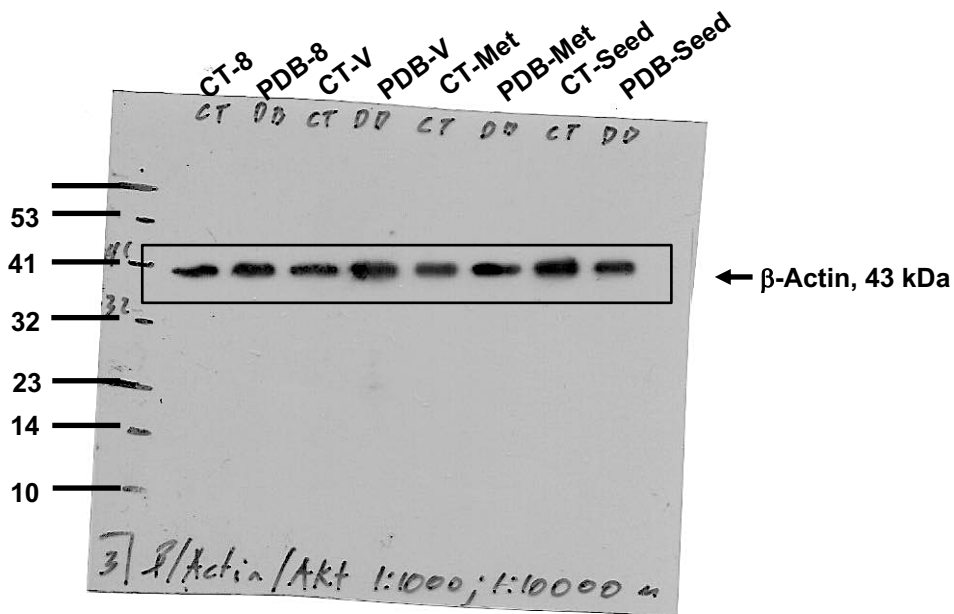

Figure 10D in paper

D

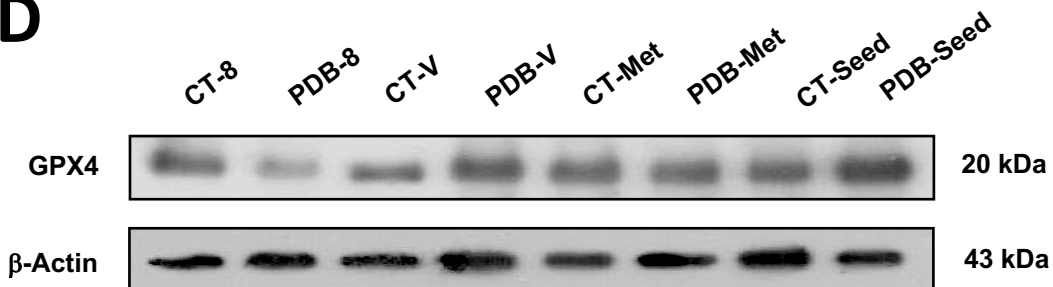

Supplement: d4fo01908c13.pdf [file d4fo01908c13.pdf]

# Figure S9 A

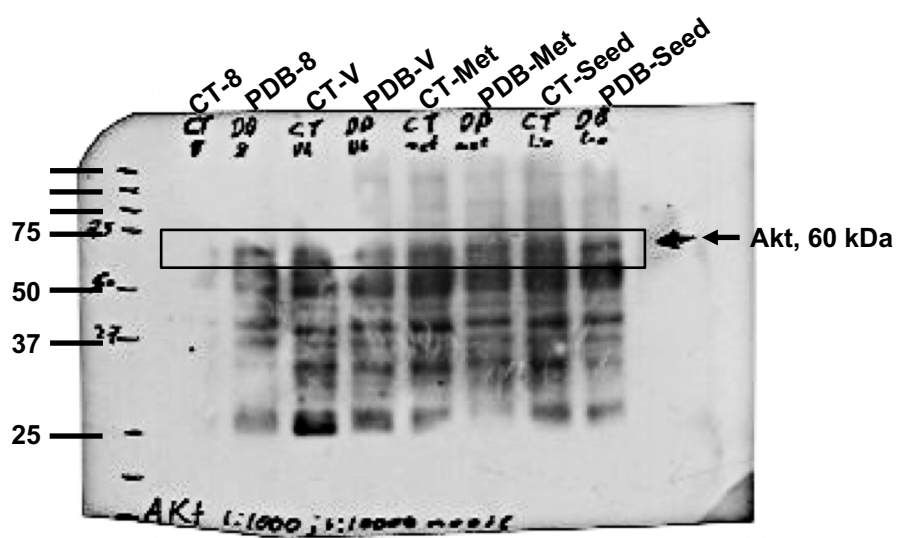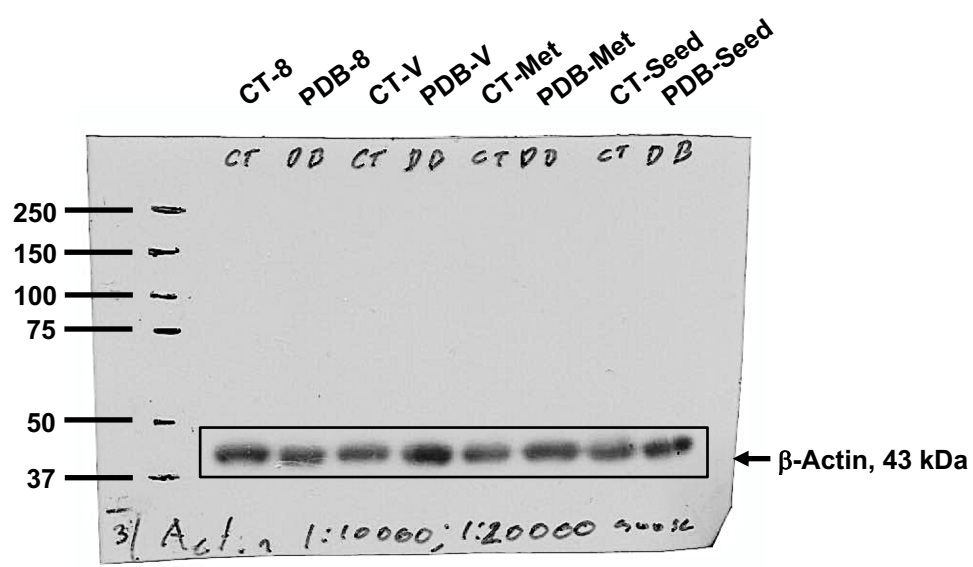

Figure 9A in paper

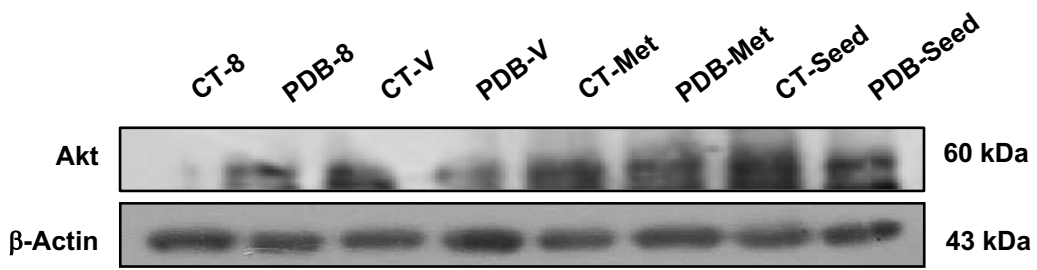

Supplement: d4fo01908c14.pdf [file d4fo01908c14.pdf]

# Figure S9 A

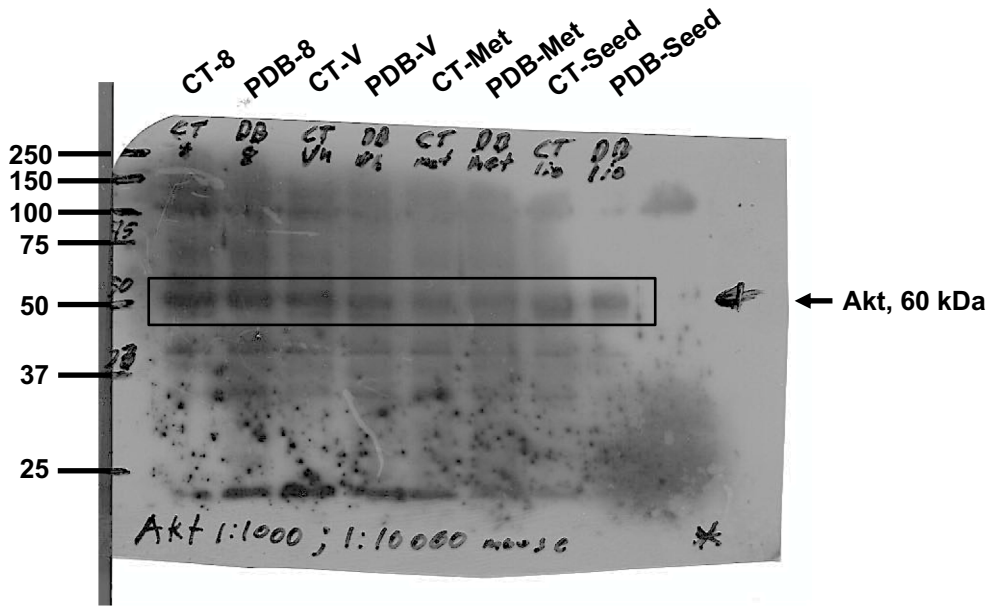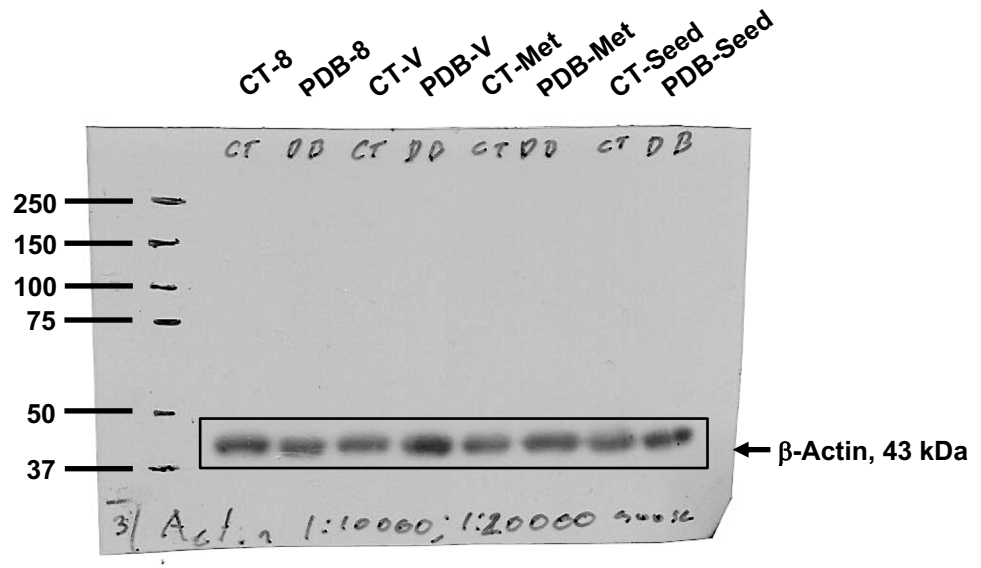

Figure 9A in paper

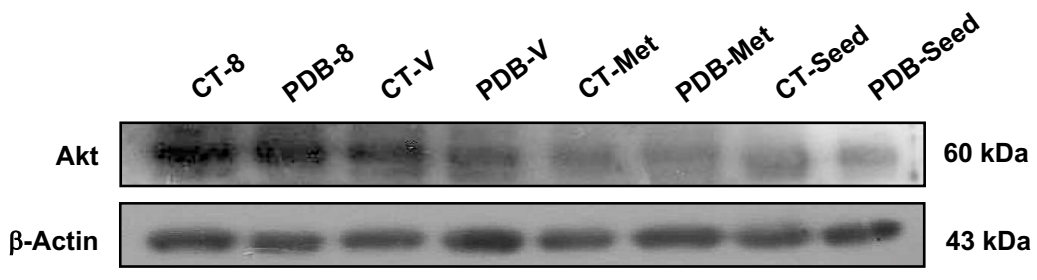

Supplement: d4fo01908c15.pdf [file d4fo01908c15.pdf]

# Figure S9 B

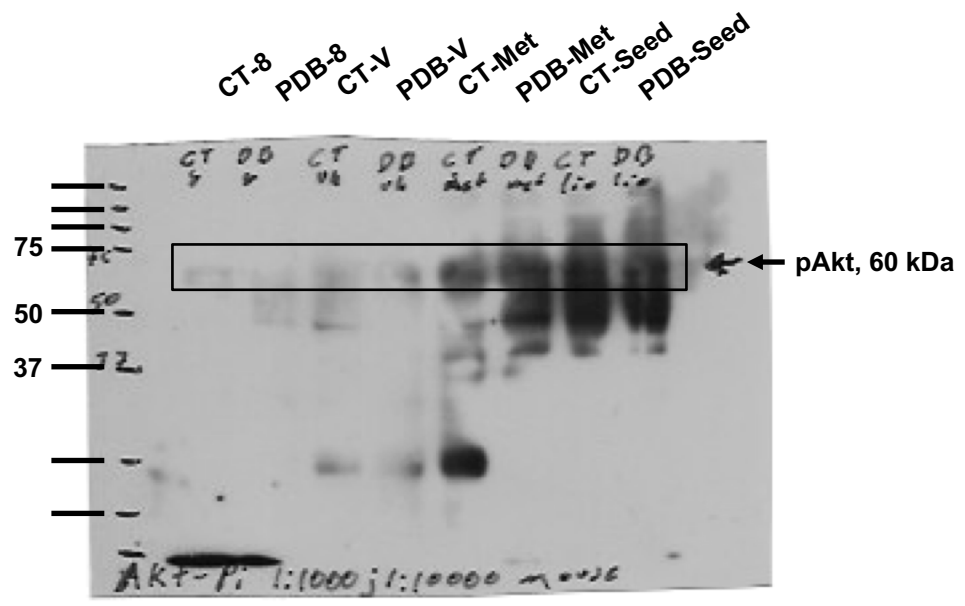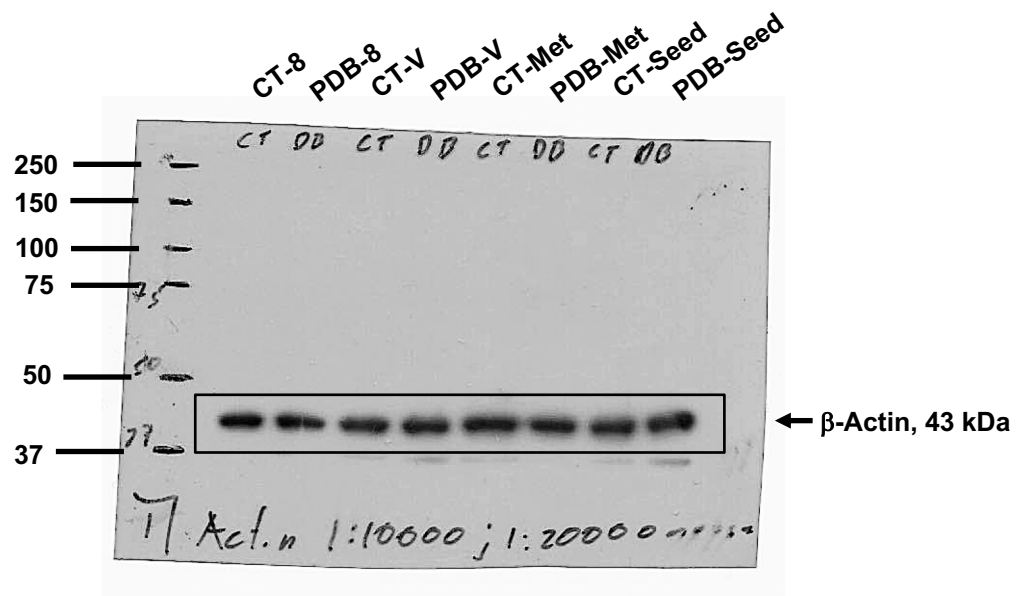

Figure 9B in paper

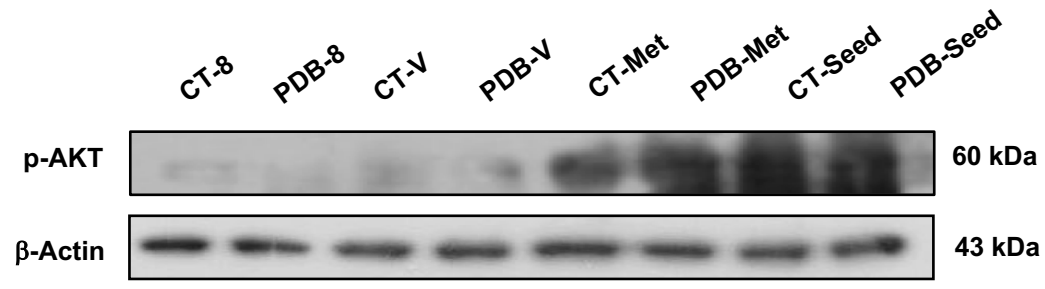

Supplement: d4fo01908c16.pdf [file d4fo01908c16.pdf]

# Figure S9 B

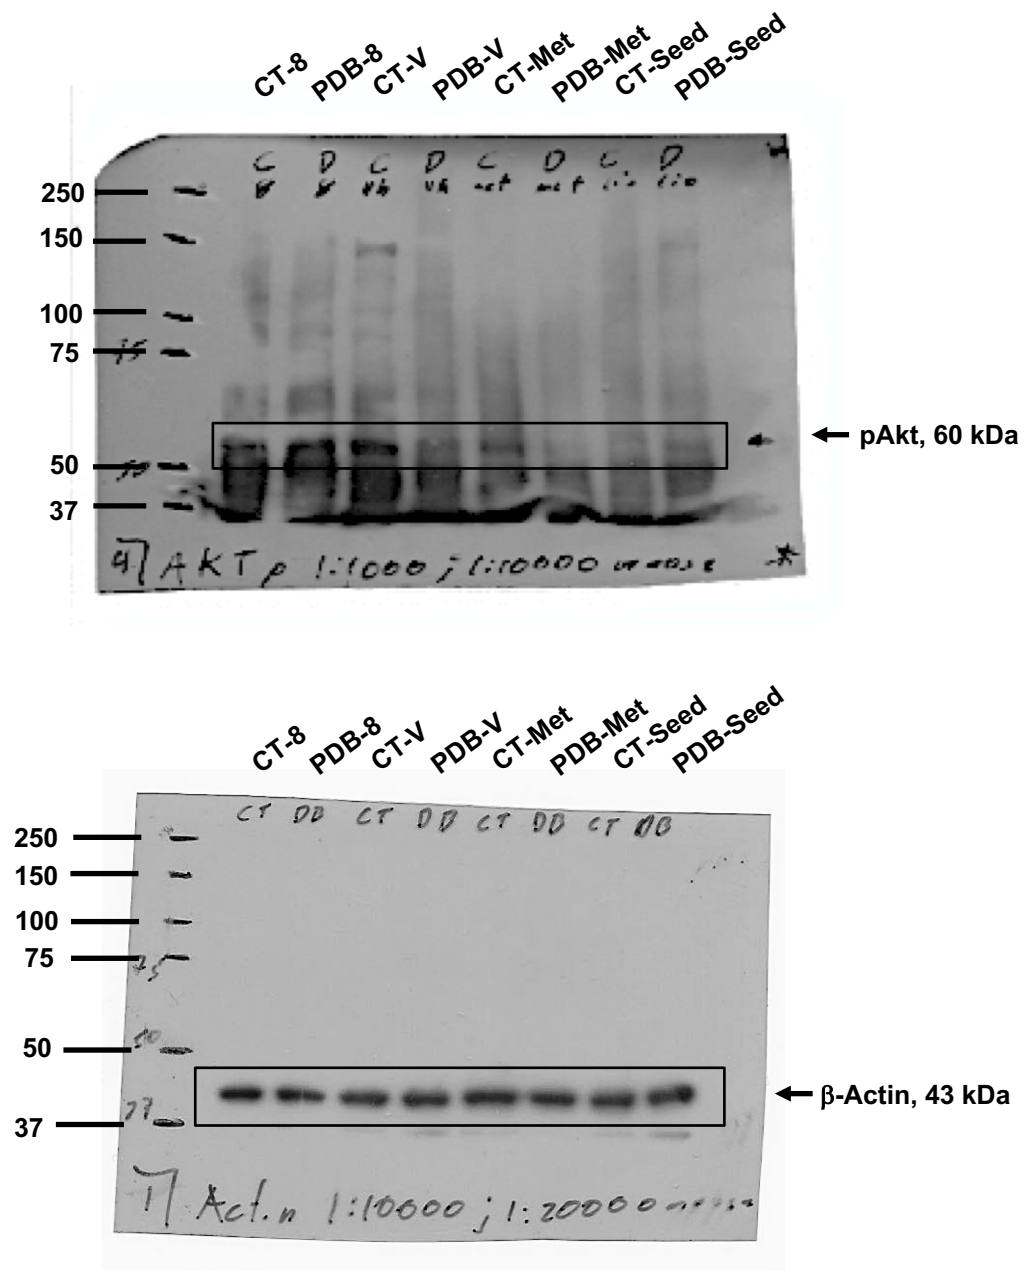

Figure 9B in paper

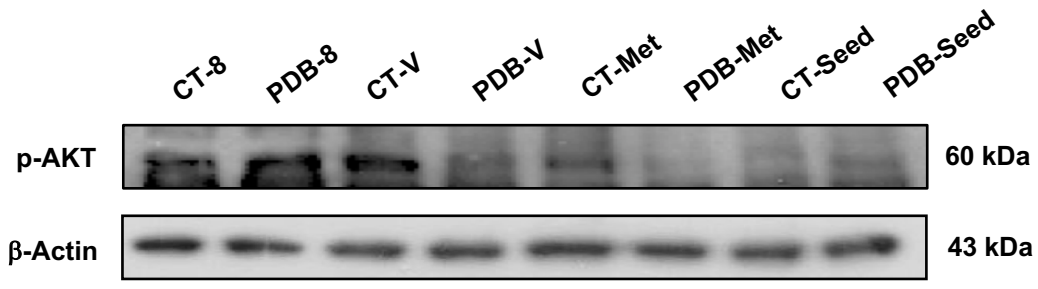

Supplement: d4fo01908c17.pdf [file d4fo01908c17.pdf]

# Figure S9 C

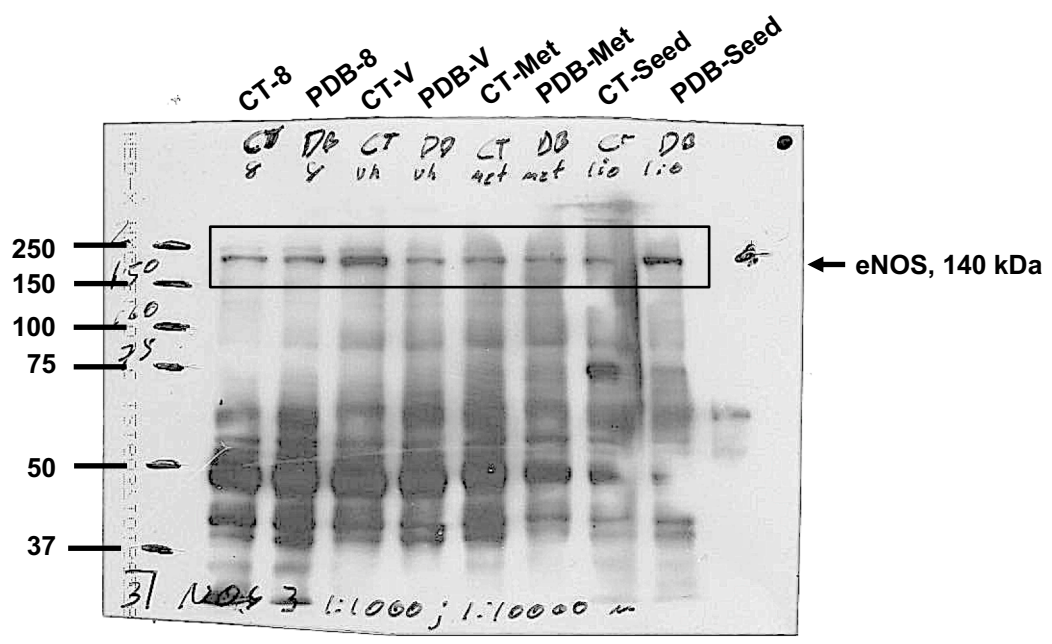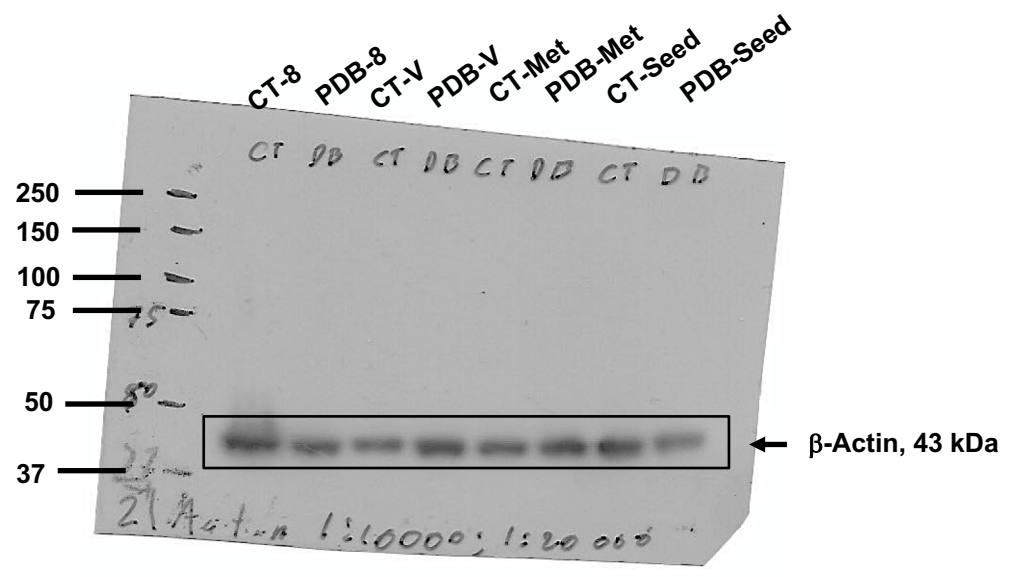

## Figure 9C in paper

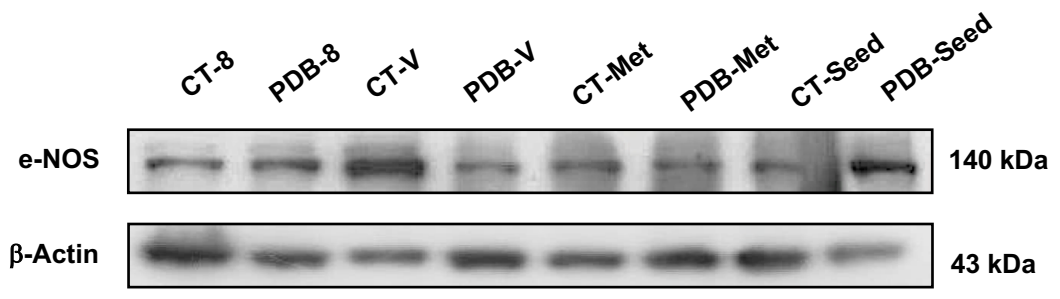

Supplement: d4fo01908c18.pdf [file d4fo01908c18.pdf]

# Figure S9 C

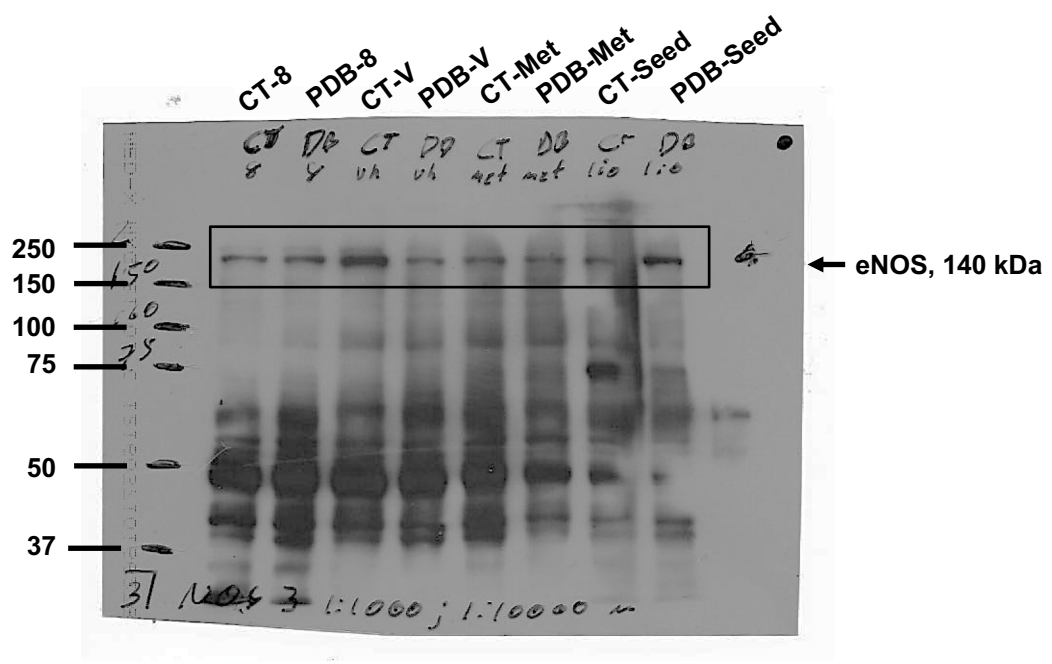

## Figure 9C in paper

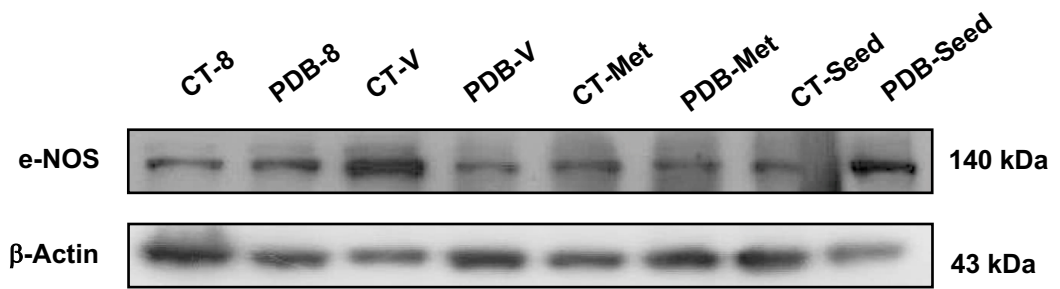

Supplement: d4fo01908c19.pdf [file d4fo01908c19.pdf]

### Figure 10 B Catalase

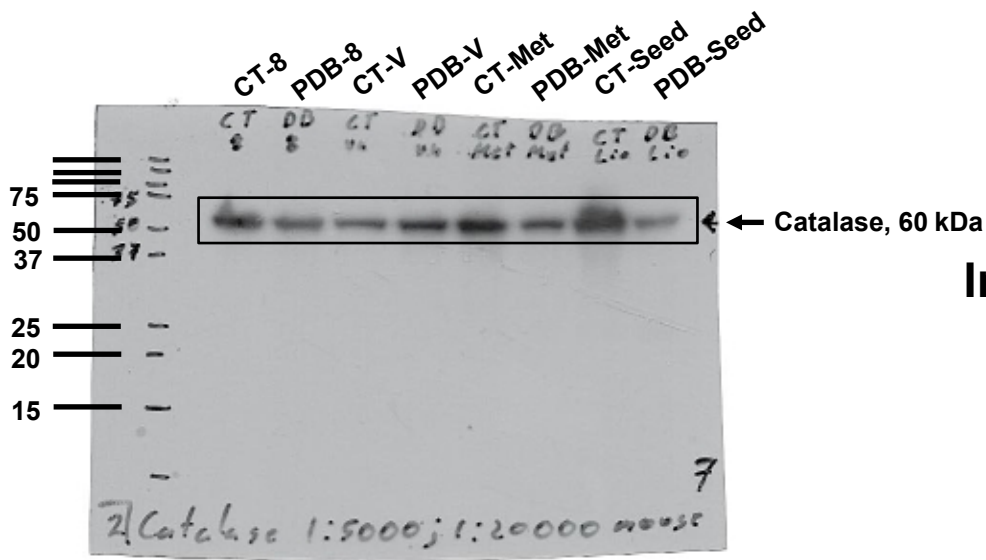

In paper,  
n = 4

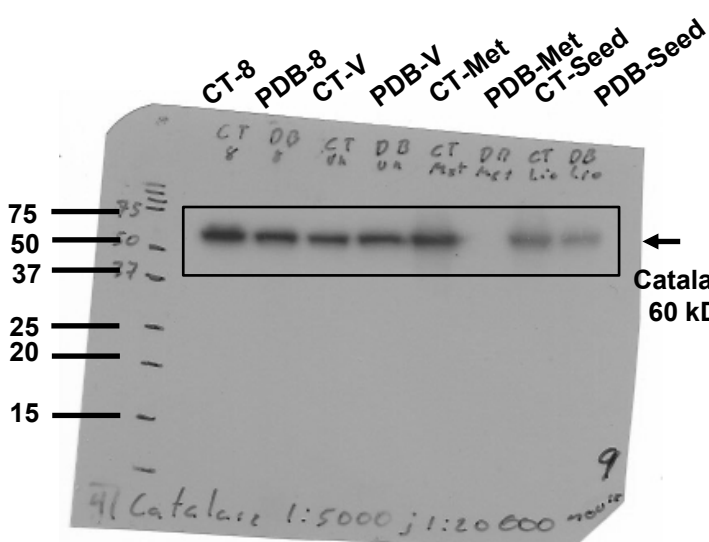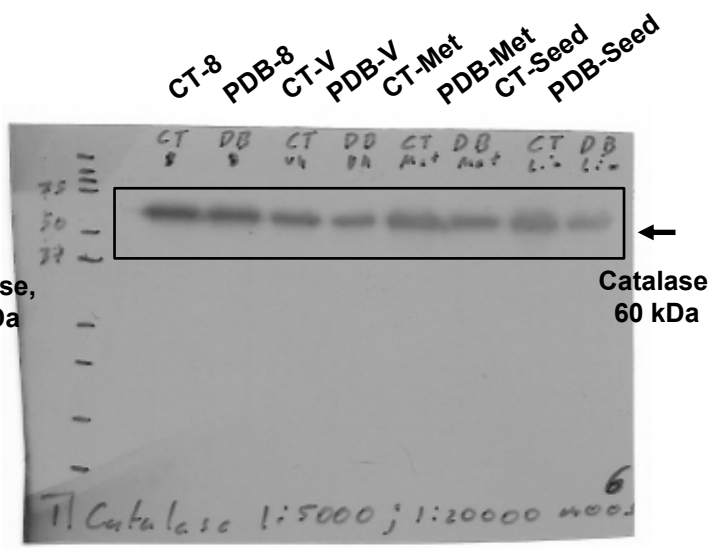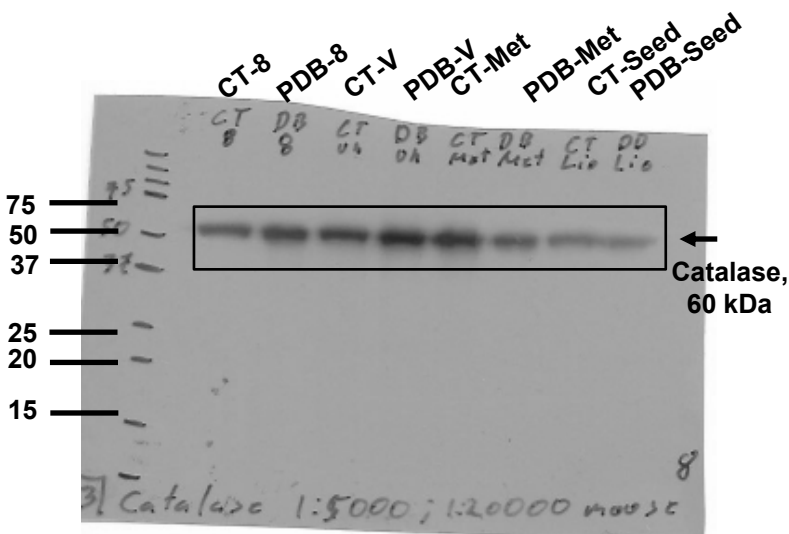

Supplement: d4fo01908c2.pdf [file d4fo01908c2.pdf]

# Figure S9 D

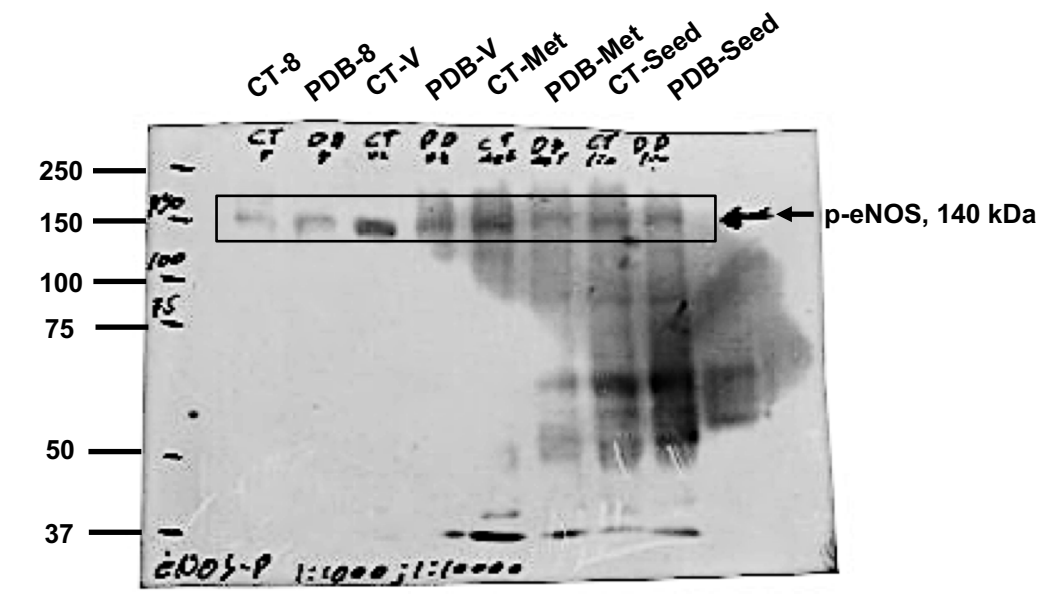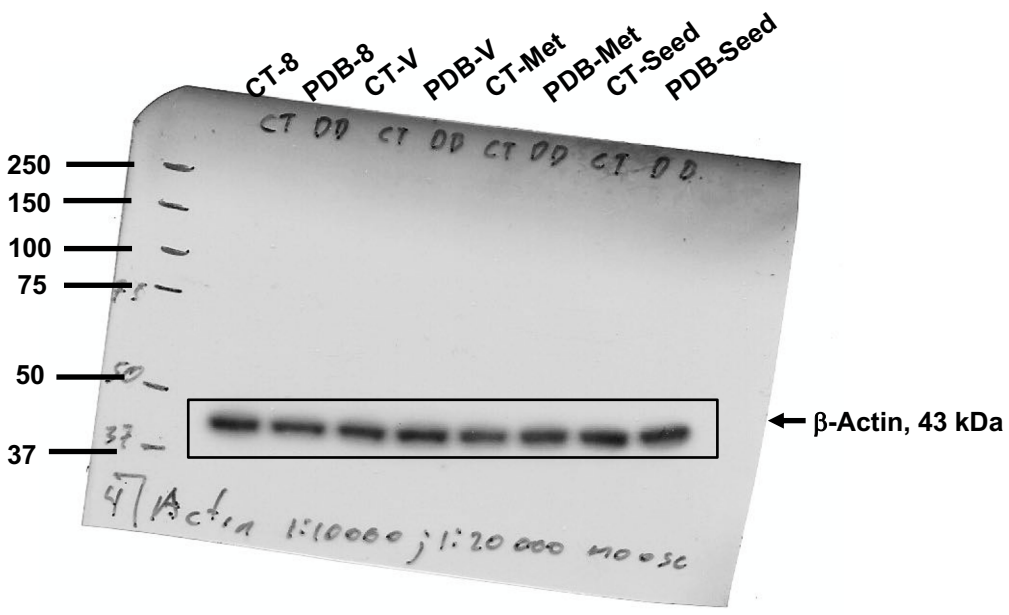

Figure 9D in paper

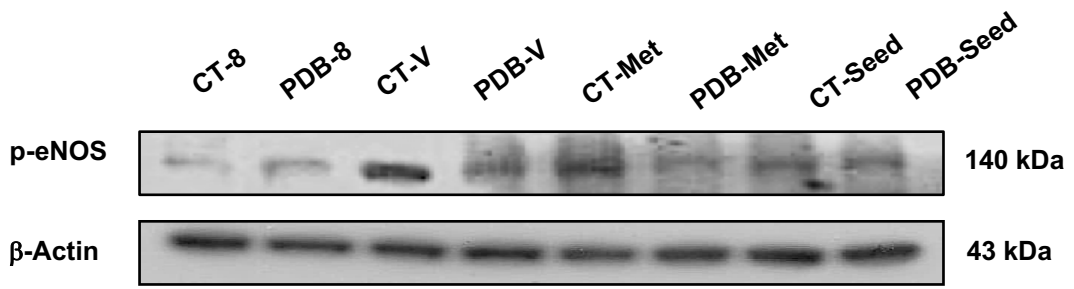

Supplement: d4fo01908c20.pdf [file d4fo01908c20.pdf]

# Figure S9 D

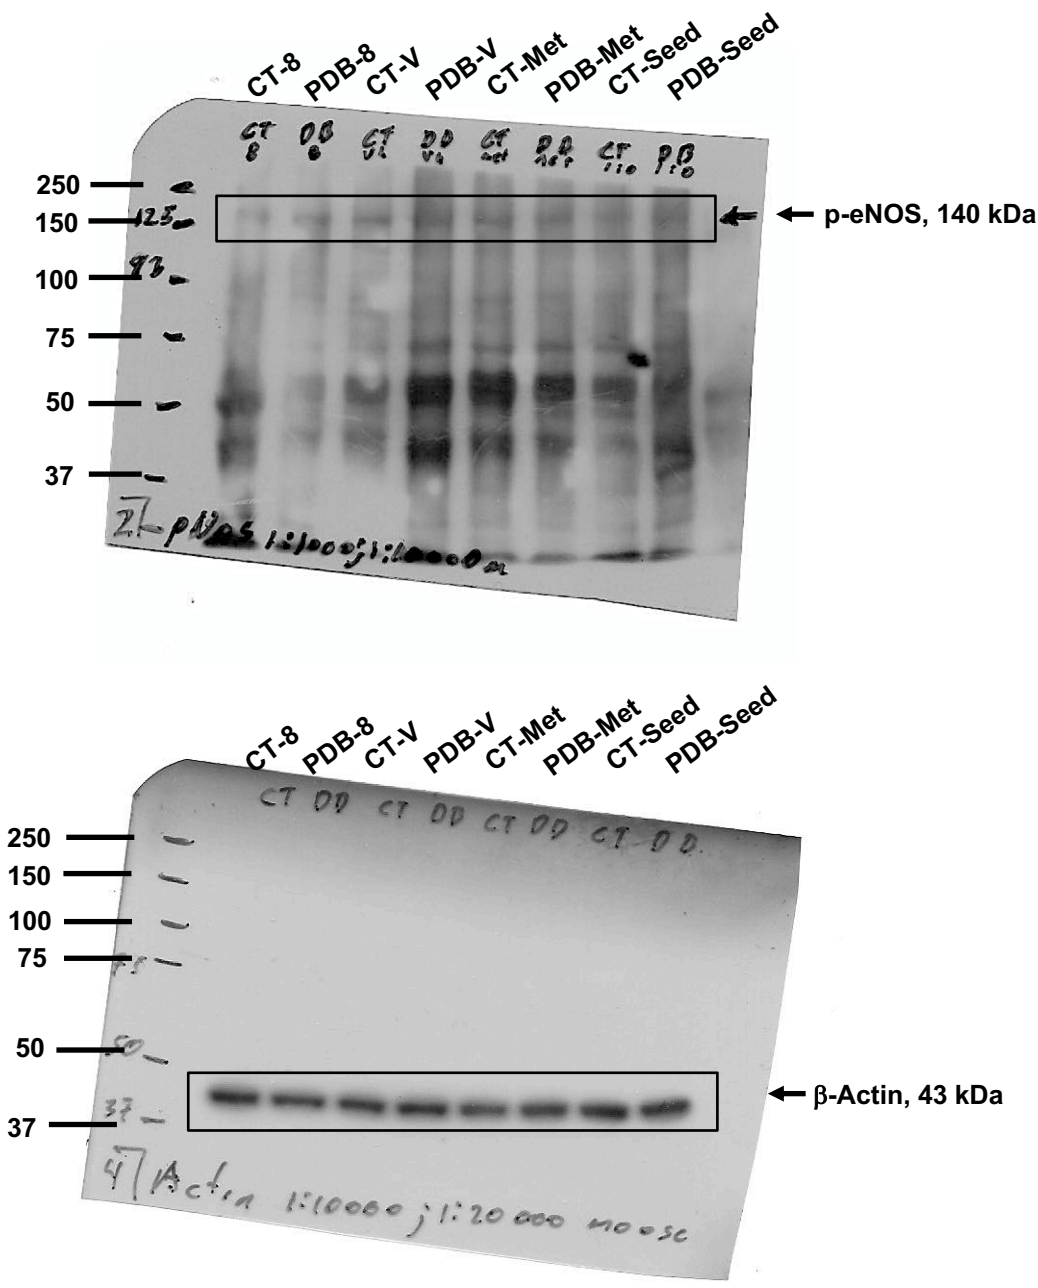

Figure 9D in paper

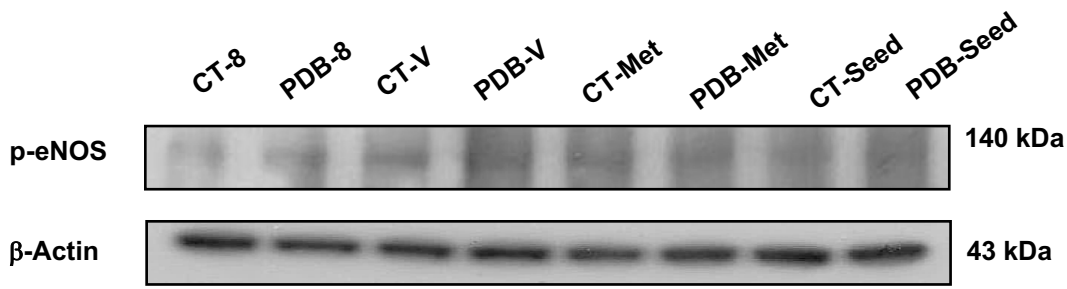

Supplement: d4fo01908c21.pdf [file d4fo01908c21.pdf]

### Figure 10 C

### Gpx 1

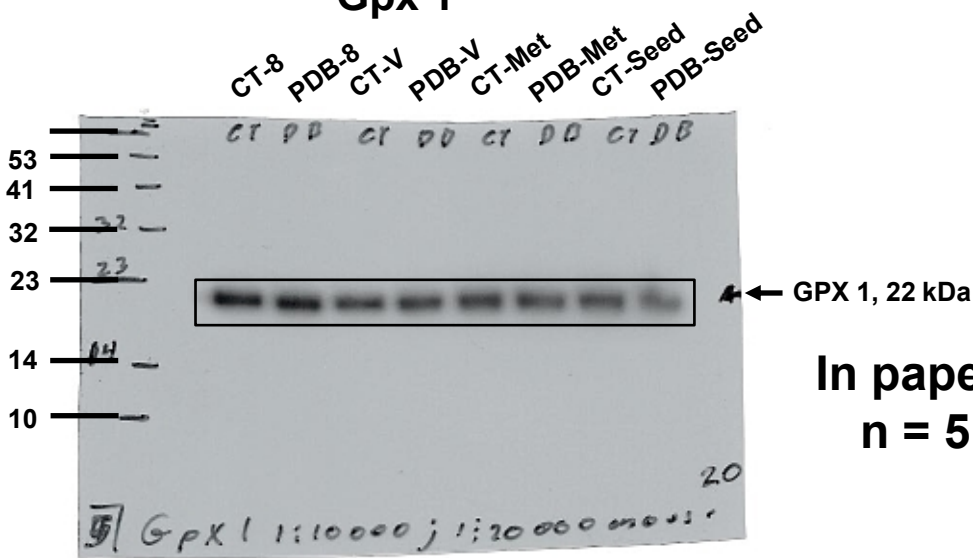

In paper,  
n = 5

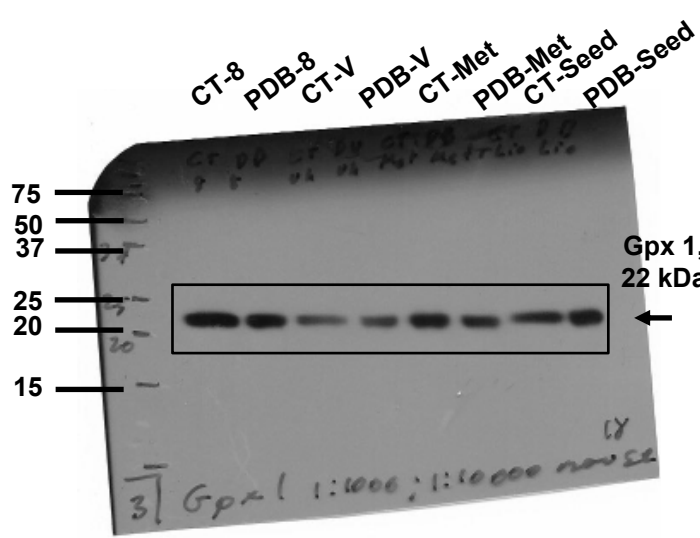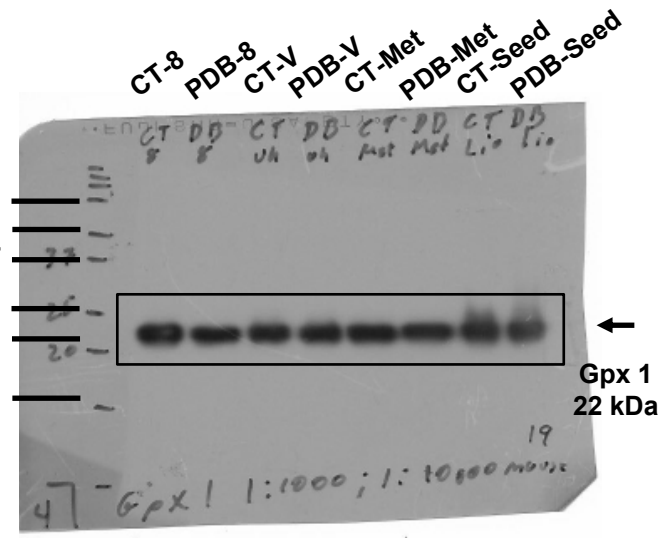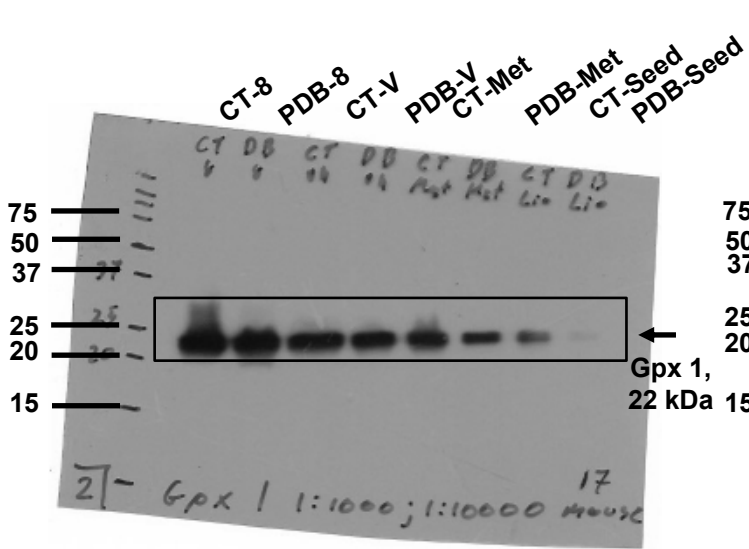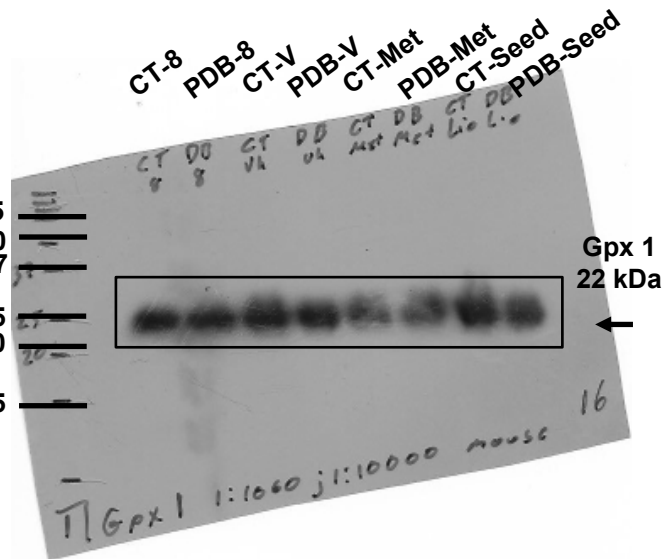

Supplement: d4fo01908c3.pdf [file d4fo01908c3.pdf]

# Figure 10 D

## Gpx 4

In paper,  
n = 4

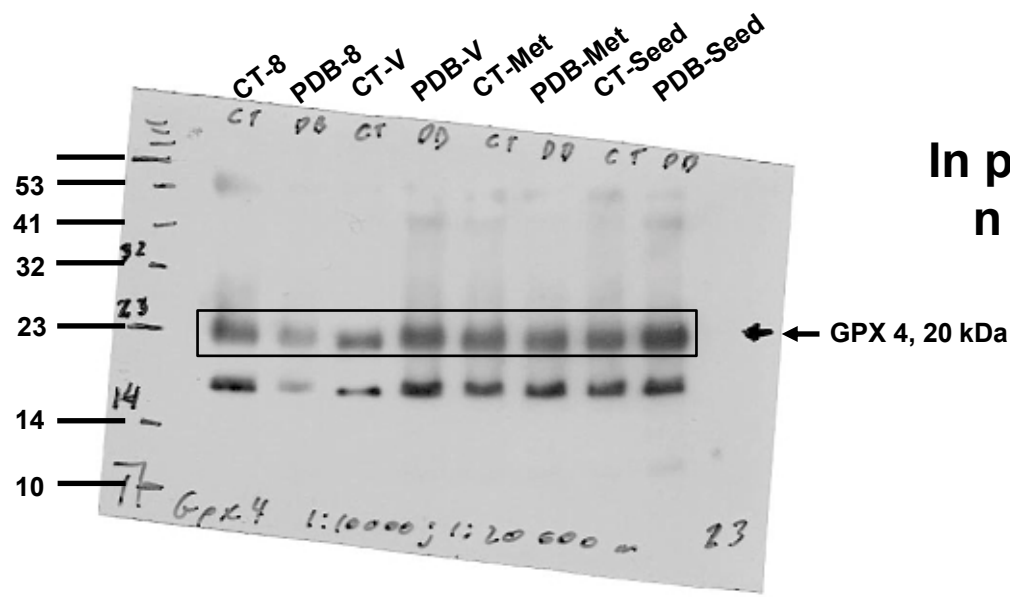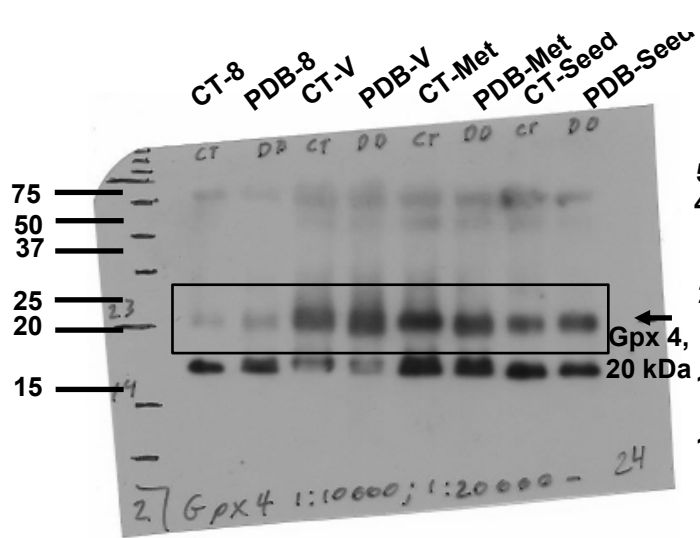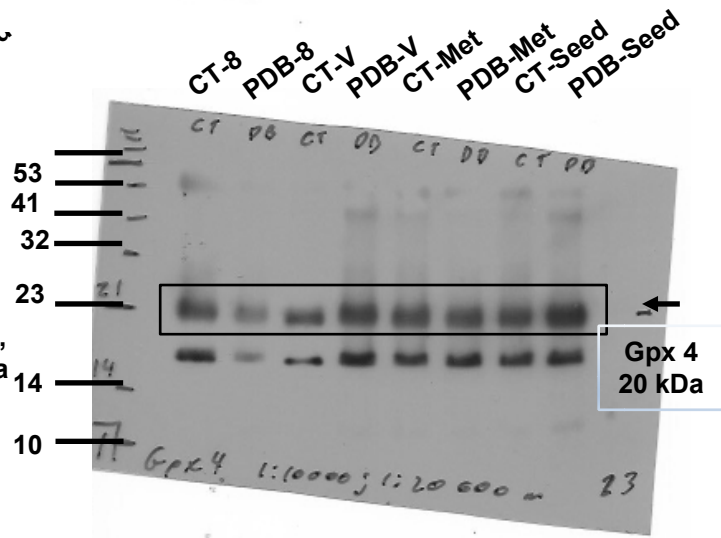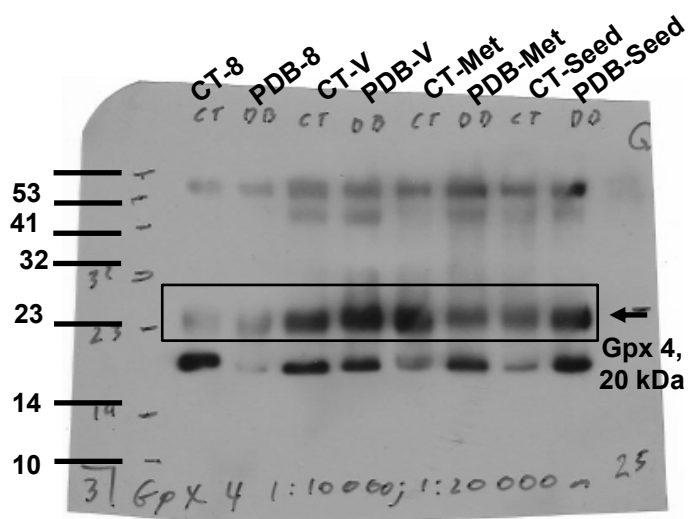

Supplement: d4fo01908c4.pdf [file d4fo01908c4.pdf]

Figure 9 A

Akt

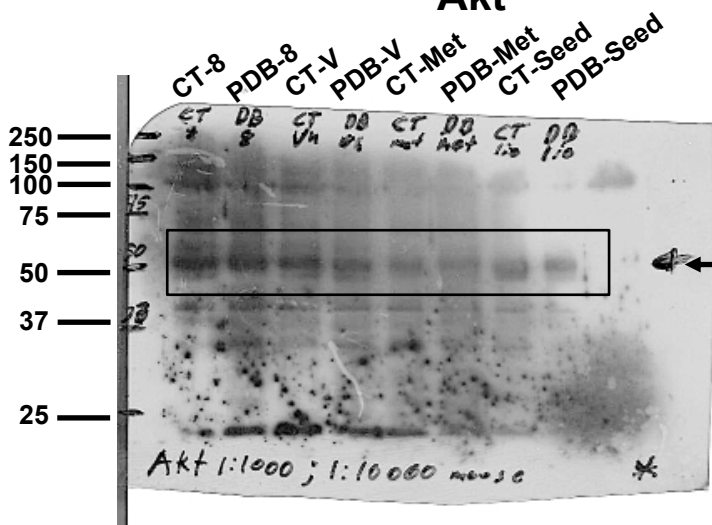

In paper,  
n = 5

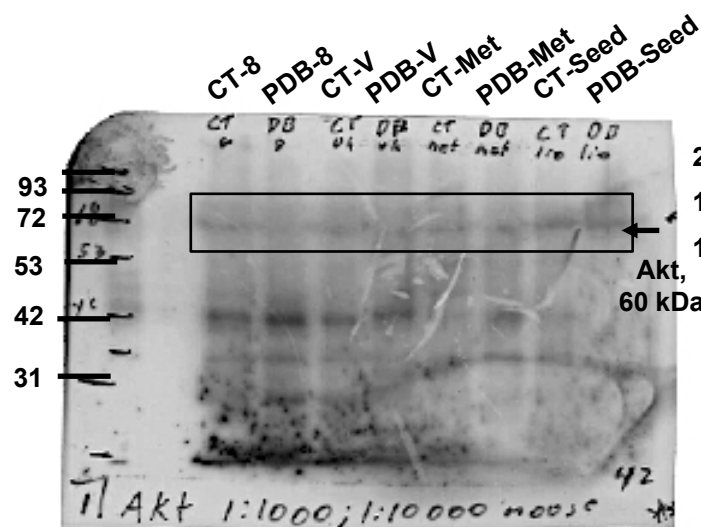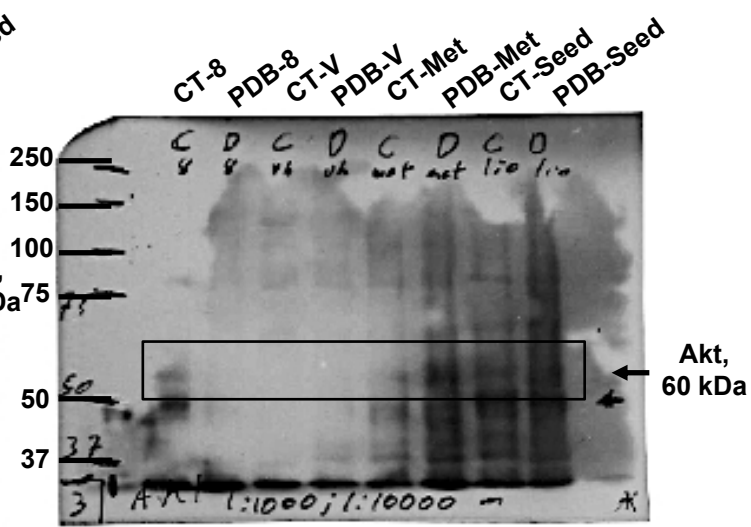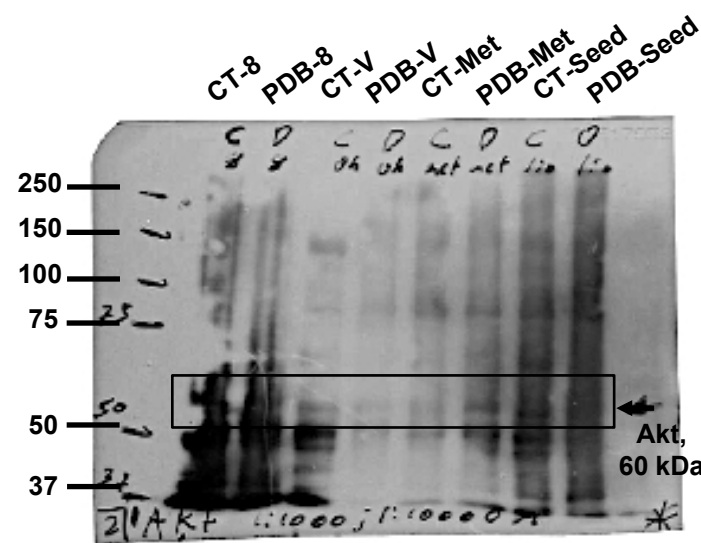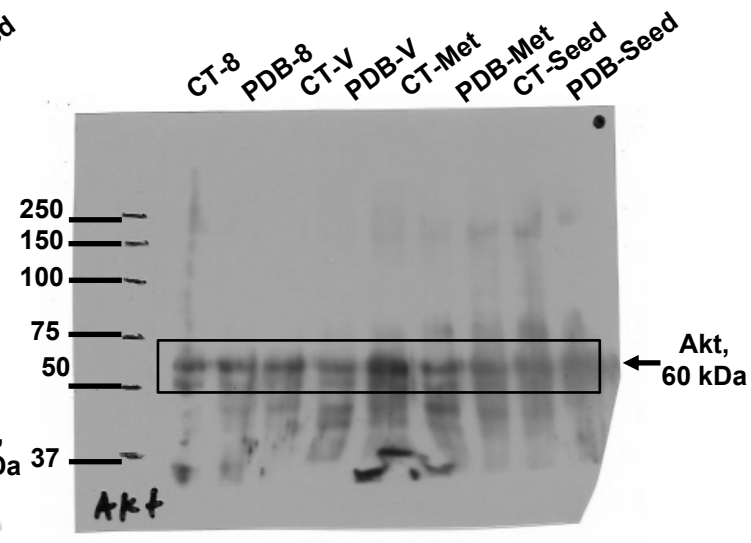

Supplement: d4fo01908c5.pdf [file d4fo01908c5.pdf]

### Figure 9 B p- Akt

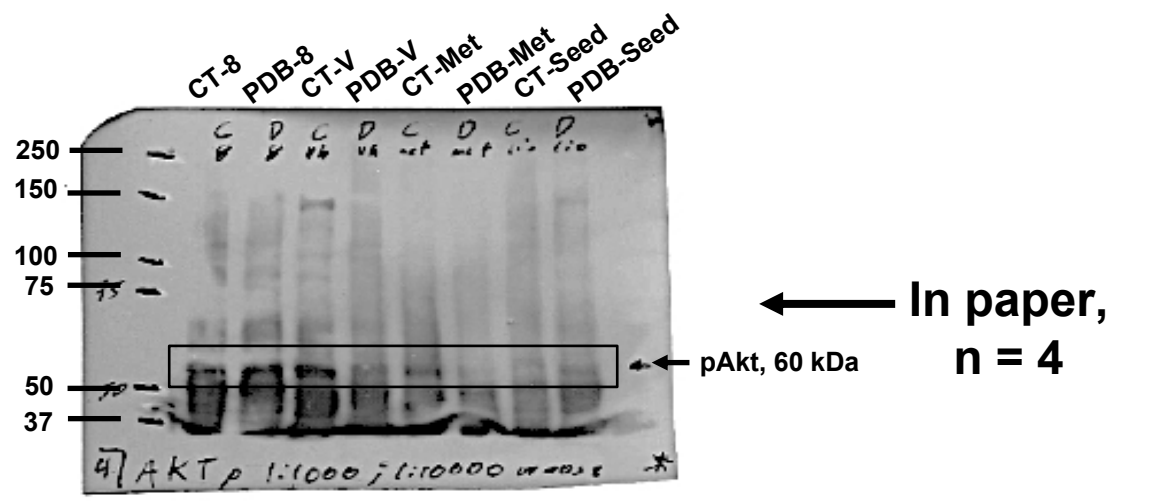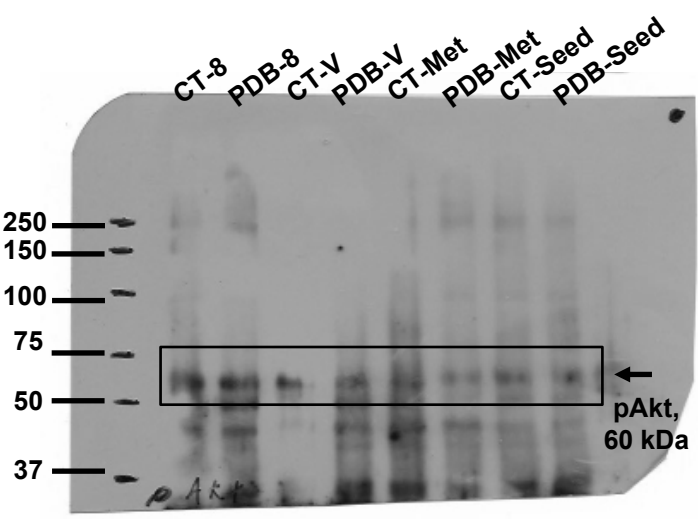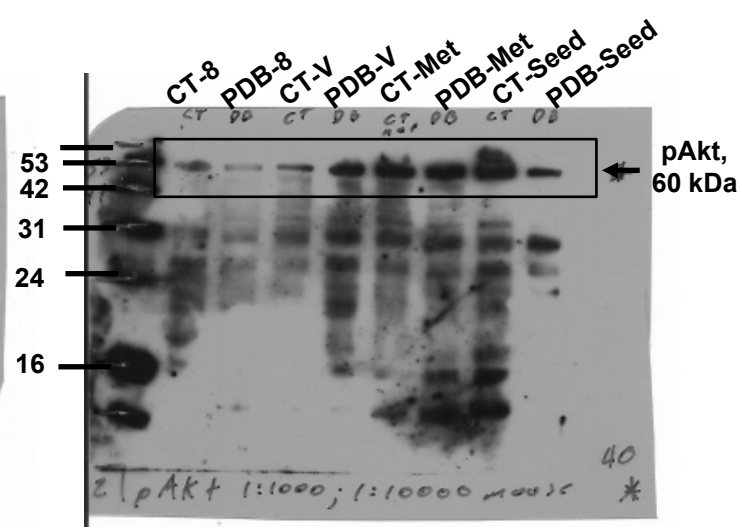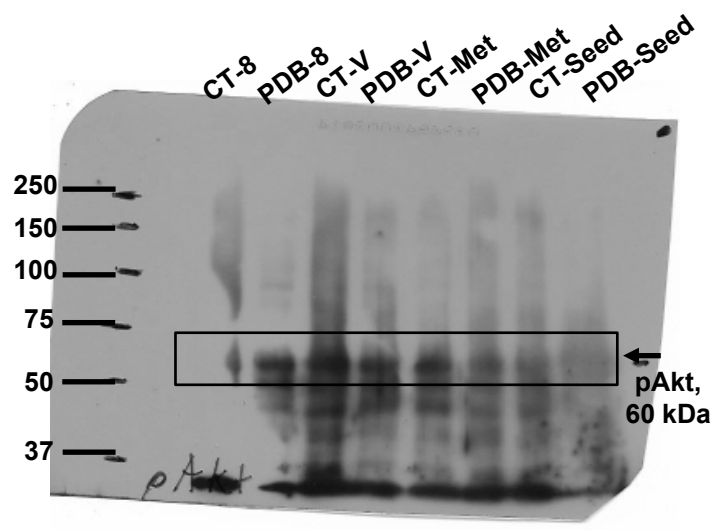

Supplement: d4fo01908c6.pdf [file d4fo01908c6.pdf]

# Complementary information to Editor

## Figure 9 C eNOS

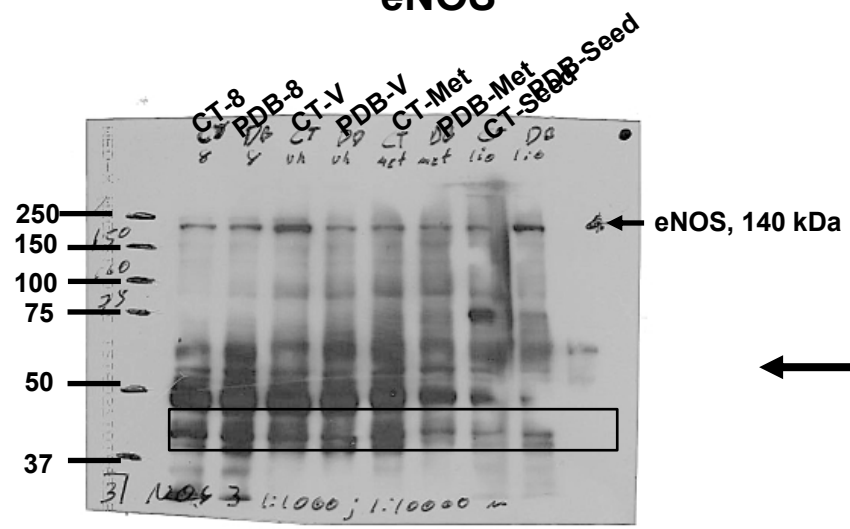

← In paper,  
n = 4

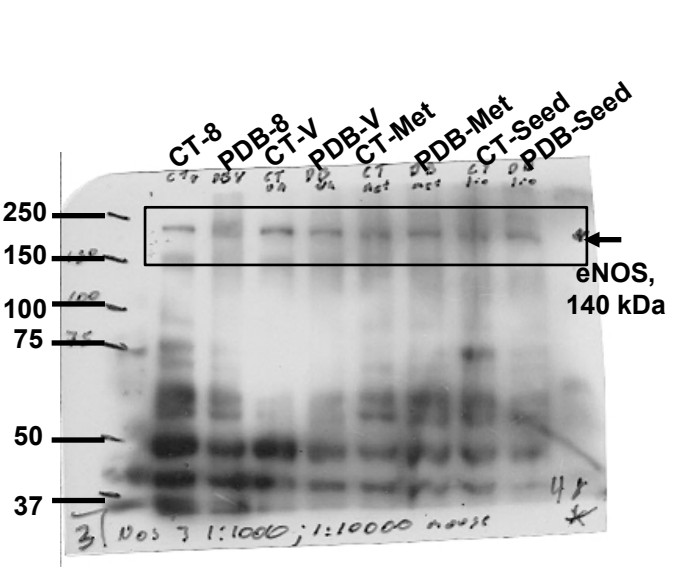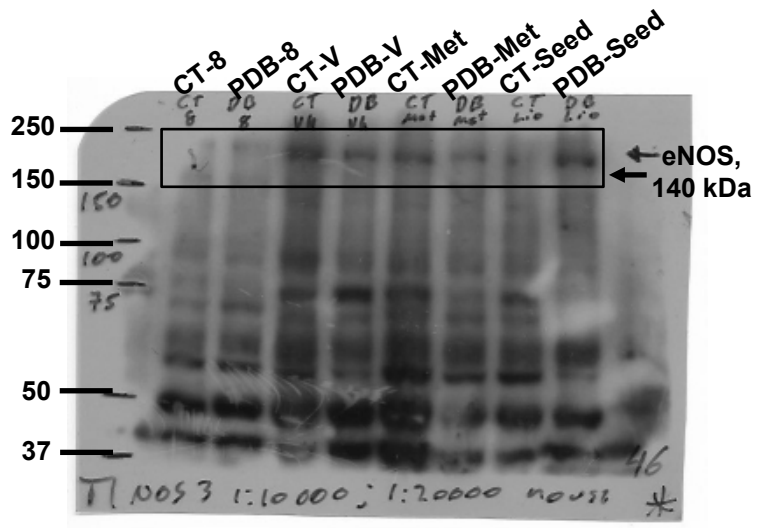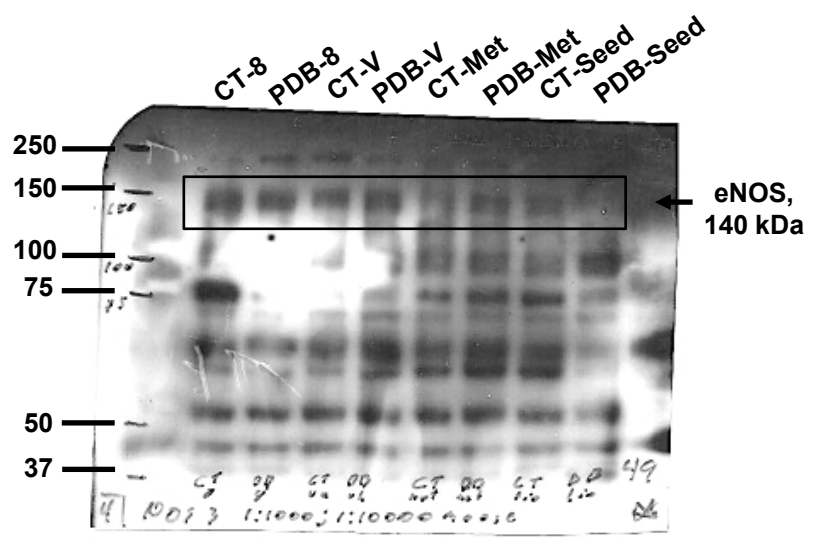

Supplement: d4fo01908c7.pdf [file d4fo01908c7.pdf]

### Figure 9 D pNOS

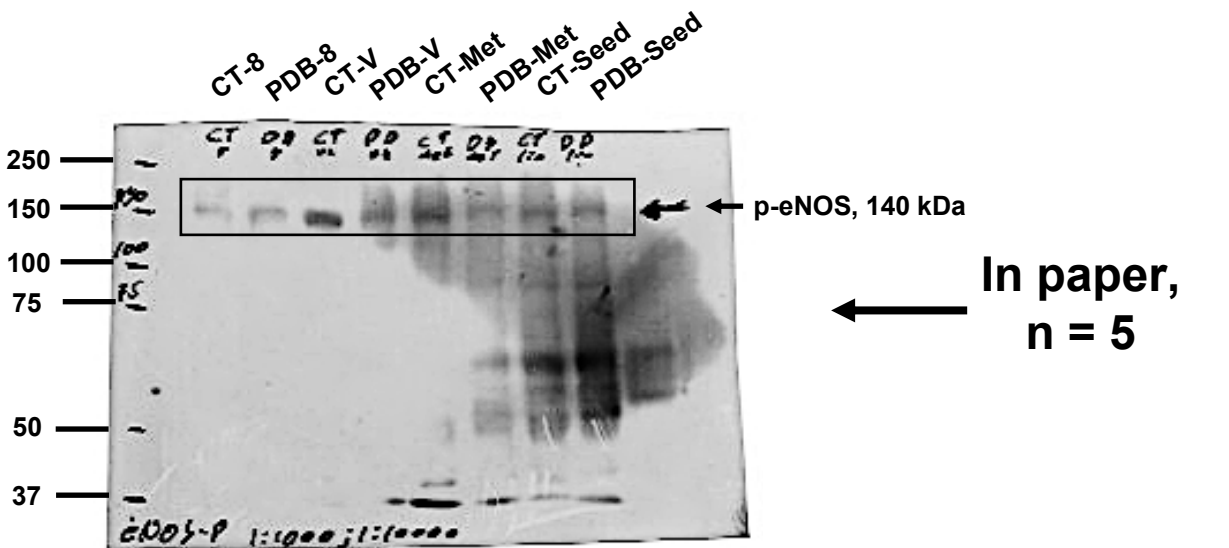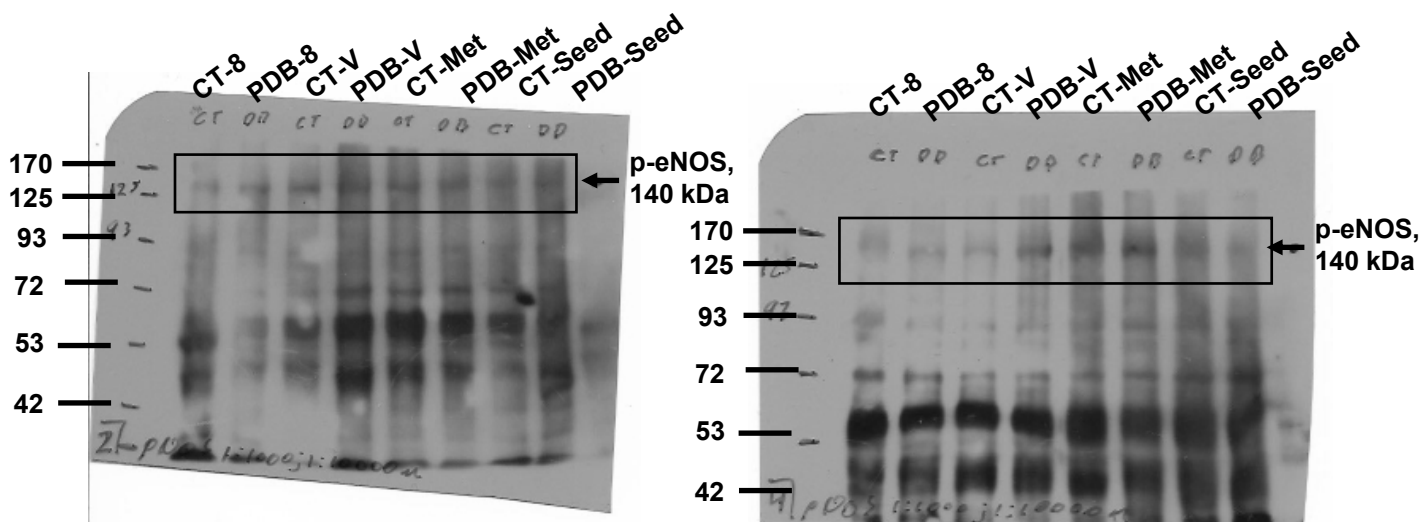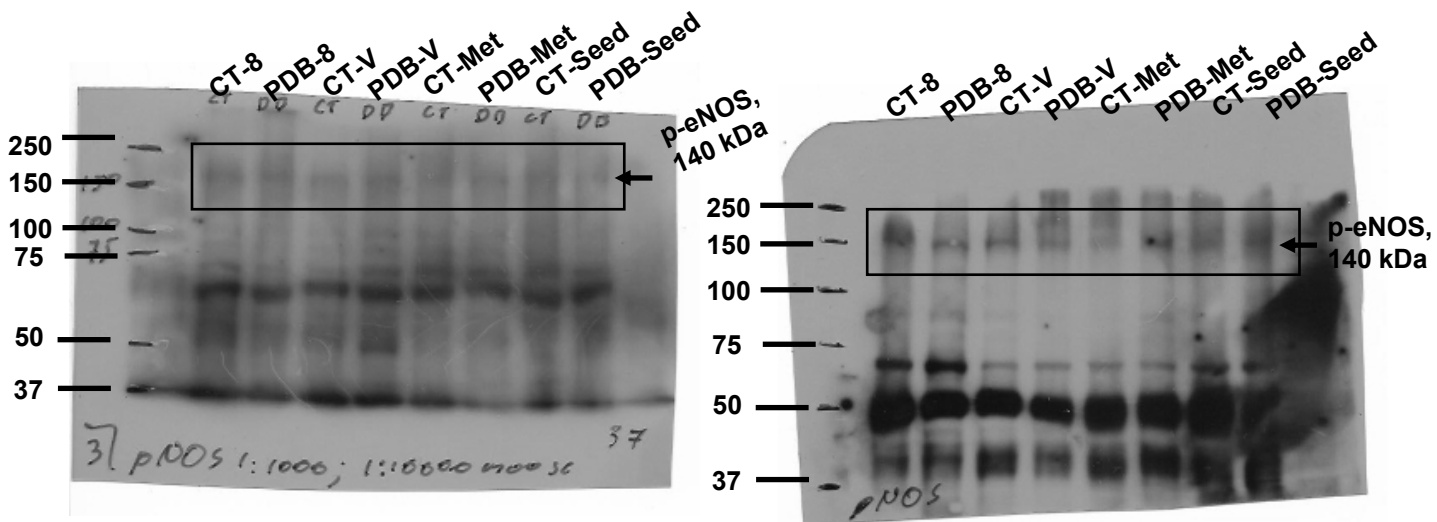

Supplement: d4fo01908c8.pdf [file d4fo01908c8.pdf]

# Figure S10 A

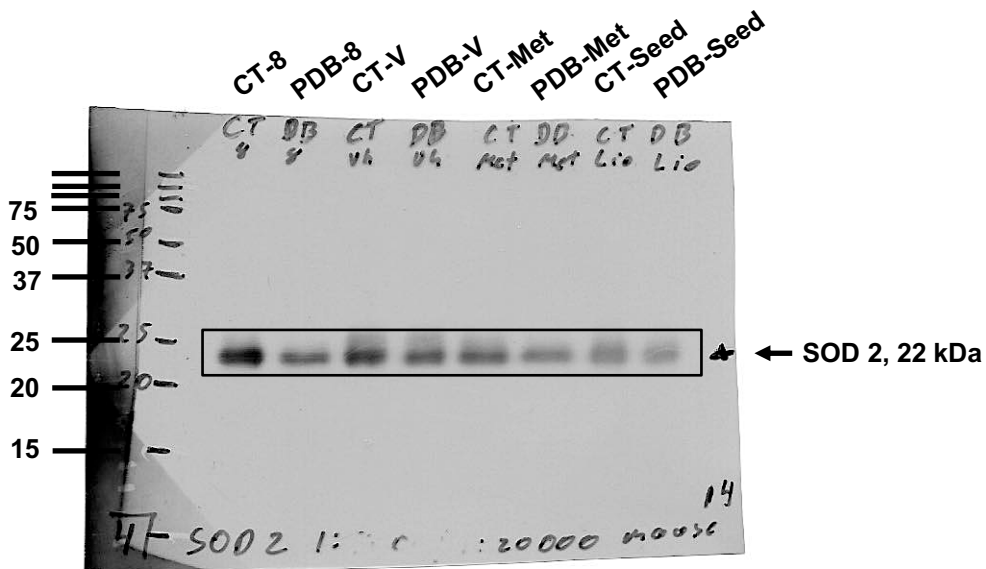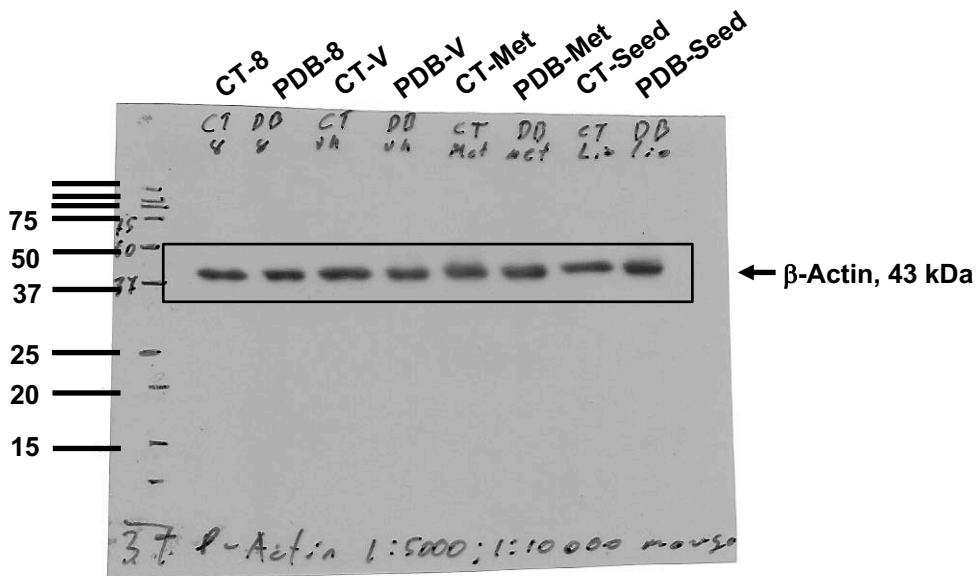

Figure 10A in paper

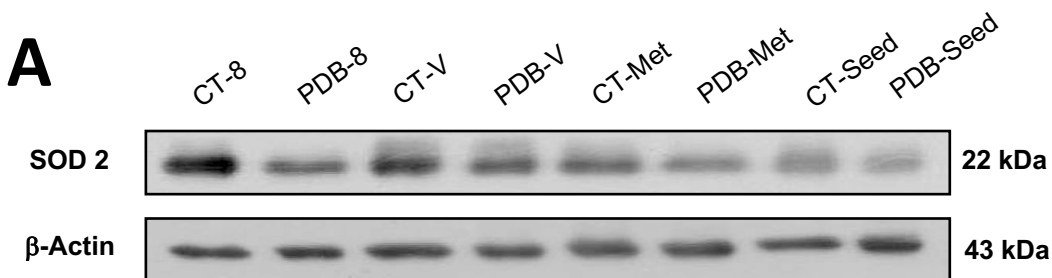

Supplement: d4fo01908c9.pdf [file d4fo01908c9.pdf]
